# Supplementary material for: The spectrum, clinical features and diagnosis of chronic cough due to rare causes
Source: PubMed Central journal article supplement — J Thorac Dis. 2021 Apr;13(4):2575–82. doi: 10.21037/jtd-20-2671 (PMC8107567; doi:10.21037/jtd-20-2671), 2021-04
Supplement: jtd-13-04-2575-dss.pdf [file jtd-13-04-2575-dss.pdf]

## Data Sharing Statement

|                     |                                                                                                                                                    |                                                                                                                               |
|---------------------|----------------------------------------------------------------------------------------------------------------------------------------------------|-------------------------------------------------------------------------------------------------------------------------------|
| <b>Article Info</b> | <a href="http://dx.doi.org/10.21037/jtd-20-2671">http://dx.doi.org/10.21037/jtd-20-2671</a>                                                        |                                                                                                                               |
| <b>Item</b>         | <b>Question</b>                                                                                                                                    | <b>Authors' Response</b><br>(place “-” if not applicable)                                                                     |
| 1                   | Would you like to share data collected for your study to others?                                                                                   | Yes                                                                                                                           |
| 2                   | If not, would you like to share the reason for your decision?                                                                                      |                                                                                                                               |
| 3                   | What data in particular will be shared?                                                                                                            | Demographic and clinical characteristics that contain no privacy information (like name, ID, address, phone number etc.)      |
| 4                   | Any other documents will be share? Such as study protocol, statistical analysis plan, informed consent form, clinical study report, analytic code. | -                                                                                                                             |
| 5                   | When will data availability begin?                                                                                                                 | April 2021                                                                                                                    |
| 6                   | When will data availability end?                                                                                                                   | January 2024                                                                                                                  |
| 7                   | To whom will you share the data?                                                                                                                   | University researchers                                                                                                        |
| 8                   | For what type of analysis or purpose?                                                                                                              | Only for scientific research.                                                                                                 |
| 9                   | How or where can the data/documents be obtained?                                                                                                   | The datasets used and/or analyzed during the current study are available from the corresponding author on reasonable request. |
| 10                  | Any other restrictions?                                                                                                                            | -                                                                                                                             |
