# Supplementary material for: The spectrum, clinical features and diagnosis of chronic cough due to rare causes
Source: PubMed Central journal article supplement — J Thorac Dis. 2021 Apr;13(4):2575–82. doi: 10.21037/jtd-20-2671 (PMC8107567; doi:10.21037/jtd-20-2671), 2021-04
Supplement: jtd-13-04-2575-supplementary.pdf [file jtd-13-04-2575-supplementary.pdf]

Table S1 Description of diagnostic criteria

| Cause of chronic cough                 | Description of diagnostic criteria in our study                                                                                                                                                                                                                                                                                                                 |
|----------------------------------------|-----------------------------------------------------------------------------------------------------------------------------------------------------------------------------------------------------------------------------------------------------------------------------------------------------------------------------------------------------------------|
| Eosinophilic bronchitis                | Normal pulmonary ventilation function, a lack of airway hyperresponsiveness, and normal average weekly peak expiratory flow variation<br>Sputum eosinophil count $\geq 25\%$<br>Cough improved after treatment with corticosteroids                                                                                                                             |
| Cough variant asthma                   | Evidence of variable airflow limitation [positive bronchial challenge test (fall in FEV1 from baseline of $\geq 20\%$ with 12.8 $\mu\text{mol}$ of methacholine or with 7.8 $\mu\text{mol}$ of histamine), or positive bronchodilator reversibility test (increase in FEV1 $\geq 12\%$ and 200 mL from baseline)]<br>Cough resolved after anti-asthma treatment |
| Gastroesophageal reflux cough          | 24-h ambulatory esophageal pH monitoring or multi-channel intraluminal impedance-pH monitoring shows a DeMeester score of $\geq 12.7$ and symptom association probability of $\geq 80\%$<br>Cough resolved or disappears after anti-reflux treatment                                                                                                            |
| Upper-airway cough syndrome            | History and clinical manifestations of nasal and/or throat conditions<br>Auxiliary tests support nasal and/or throat conditions<br>Cough improved after specific therapy targeted to upper-airway cough syndrome                                                                                                                                                |
| Chronic bronchitis                     | Chronic cough and sputum production for at least 3 months per year for two consecutive years<br>Other causes of chronic cough have been excluded<br>Cough improved with using of mucolytic therapy and judicious using of antibiotic therapy                                                                                                                    |
| Bronchiectasis                         | Chest HRCT showed bronchial enlargement and distortion<br>Cough improved with treatment directed at bronchiectasis                                                                                                                                                                                                                                              |
| Atopic cough                           | Normal pulmonary ventilatory function and bronchial responsiveness<br>Lack of sputum eosinophilia<br>Evidence of atopy<br>Response to corticosteroids or antihistamine treatment                                                                                                                                                                                |
| Postinfectious cough                   | Chronic cough after common cold or acute upper respiratory tract infection<br>Cough gradually resolved with symptomatic treatment                                                                                                                                                                                                                               |
| Obstructive sleep apnea syndrome       | History of snoring, sleep disturbance at night, and excessive daytime sleepiness<br>Positive polysomnography<br>Cough improved with the treatment with nasal continuous positive airway pressure during sleeping                                                                                                                                                |
| Mucous cyst of salivary gland          | Chronic cough and white frothy sputum<br>Neoplasm in root of tongue on nasopharyngoscopy<br>Pathology revealed mucous cyst of salivary gland<br>Cough improved with resection of the neoplasm                                                                                                                                                                   |
| Laryngocarcinoma                       | Neoplasm in laryngopharynx with bronchoscopy/nasopharyngoscopy<br>Pathology revealed Laryngocarcinoma<br>Cough improved after laryngocarcinoma operation                                                                                                                                                                                                        |
| Vocal cord dysfunction                 | Vocal fold narrowing (adduction) on laryngoscopy during a symptomatic episode<br>Cough improved with speech pathology techniques designed to relieve glottal constriction during inspiration and to recognize and alter the response to precipitants                                                                                                            |
| Laryngeal amyloidosis                  | Nasopharyngoscopy revealed the presence of a mass, arising from the right false vocal cord<br>Pathology revealed amyloidosis<br>Cough improved after laryngeal amyloidosis resection                                                                                                                                                                            |
| Protracted bacterial bronchitis        | Chronic productive cough or dry cough<br>Normal chest HRCT<br>Routine sputum culture for bacteria could be positive<br>Cough improved with more than 2 weeks of antibiotic treatment                                                                                                                                                                            |
| Diffuse panbronchiolitis               | Symptoms, signs related with nasosinusitis<br>Mild dilation of the bronchiolar passages and a "tree-in-bud" pattern on chest HRCT<br>Improvement in cough after long-term therapy with macrolide antibiotics                                                                                                                                                    |
| Fungus-associated cough                | Environmental fungi were positive in the cultured sputum<br>Cough improved with antifungal drugs                                                                                                                                                                                                                                                                |
| Bronchial tuberculosis                 | Swollen mucosa, mucosal granularity, ulceration, or bronchial scarring on bronchoscopically visible lesions of trachea, main bronchi and/or upper bronchi<br>Bronchial washings are smear-positive for acid-fast bacilli<br>Cough improved with anti-tuberculosis treatment                                                                                     |
| Bronchial foreign body                 | Foreign body was found in bronchus according to bronchoscopy<br>Cough improved after foreign body removed                                                                                                                                                                                                                                                       |
| Broncholithiasis                       | Chest HRCT showed bronchus intermedius calcified nodes<br>Visible stones on Bronchoscopy<br>Cough improved after endoscopic removal                                                                                                                                                                                                                             |
| Bronchial adenoid cystic carcinoma     | Chest HRCT revealed thickening of right main bronchus and middle bronchial wall<br>Neoplasm in right main bronchus was observed with bronchoscopy<br>Biopsy pathology revealed adenoid cystic carcinoma<br>Cough improved with operative treatment                                                                                                              |
| Kartagener syndrome                    | History of chronic sinusitis,<br>Bronchiectasis and situs inversus on chest CT<br>Dextrocardia                                                                                                                                                                                                                                                                  |
| Relapsing polychondritis               | CT or PET-CT showed thickening, calcification or metabolic enhancement of cartilages in nose, ear, rib, etc.<br>Auricular cartilage biopsies showed cartilage inflammation<br>Cough improved after treatment with oral steroids                                                                                                                                 |
| Sarcoidosis                            | Normal pulmonary ventilation function; diffusion capacity was decreased mildly<br>Pathologic confirmation from the lymph nodes sampled via endobronchial ultrasound with transbronchial needle aspiration<br>Cough improved after treatment with oral steroids                                                                                                  |
| Postoperative cough                    | Chronic cough after thoracic surgery<br>Cough could not be explained by other cause of chronic cough                                                                                                                                                                                                                                                            |
| Interstitial lung disease (early)      | Cough without dyspnea, local Velcro rales might exist<br>HRCT showed a little ground glass shadow<br>Diffusion capacity was decreased mildly or normal<br>Cough improved with oral corticosteroids                                                                                                                                                              |
| Atypical pneumoconiosis                | Long term exposure to sand weather in Northwest China<br>Chest CT scan showed bilateral diffuse nodules<br>Pathological change of sand nodules was identified by transbronchial lung biopsy<br>Other cause of chronic cough was excluded                                                                                                                        |
| Cryptogenic organizing pneumonia       | HRCT showed pulmonary nodules and ground glass lesions<br>Pathological examination confirms the diagnosis<br>Cough resolved with corticosteroids therapy                                                                                                                                                                                                        |
| Somatic cough syndrome                 | Cough occurs only during the daytime, and disappears when focusing and when asleep<br>Multiple psychogenic factors such as sensation, belief, mood, learning, and habit can stimulate the cough<br>Excessive thoughts, feelings, or behaviors related to cough<br>Cough improved with suggestion therapy, hypnosis or psychologist psychotropic drugs           |
| Hyperventilation syndrome              | Patients presented with cough as well as symptoms related with typical hyperventilation syndrome symptoms<br>The total score of the Nijmegen Symptomatic Questionnaire was $\geq 23$ points<br>Cough resolved after treatment with breathing exercise or psychotherapy                                                                                          |
| ACEI-induced cough                     | Cough relieved after withdrawal of ACEI                                                                                                                                                                                                                                                                                                                         |
| Arrhythmia related cough               | Cough with post sternal thump and premature beats as shown by auscultation and 24 h-electrocardiogram examination<br>Cough relieved with the treatment of arrhythmia drugs                                                                                                                                                                                      |
| Herniated cervical intervertebral disc | Chronic cough accompanied by pain in neck, shoulder, or upper back, and numbness or tingling in the arm<br>Herniated cervical intervertebral disc was confirmed with magnetic resonance imaging<br>Cough relieved after treatment of herniated cervical intervertebral disc                                                                                     |
| Goiter related cough                   | The diagnosis of goiter is exclusive diagnosis<br>Cough relieved after goiter was treated                                                                                                                                                                                                                                                                       |
| Occupational cough                     | The cough symptoms appear in the workplace and improve after withdrawal from the workplace                                                                                                                                                                                                                                                                      |
| Styloid process syndrome               | X ray confirmed long styloid process<br>Cough resolved after surgery                                                                                                                                                                                                                                                                                            |
| Hypereosinophilic syndrome             | The chest CT showed scattered nodules in both lungs, cardiac enlargement<br>The eosinophil percentage in the peripheral blood and sputum was markedly increased<br>PDGFRA fusion gene could be positive<br>Cough improved with corticosteroids and response to Imatinib                                                                                         |
| Catamenial cough                       | Cough occurred or was worse during menstrual period<br>Other causes were excluded<br>Cough improved after endocrine regulation therapy                                                                                                                                                                                                                          |
| Langerhans cell histiocytosis          | Chest HRCT showed nodular cystic reticulation, mediastinal lymph node enlargement<br>Diffusion capacity was impaired<br>Bronchoscopic biopsy specimen confirmed the diagnosis                                                                                                                                                                                   |
| Cardiogenic cough                      | Cough accompanied with signs related with heart failure, which were indicated by electrocardiography, cardiac ultrasonography<br>Cough relief after treatment directed to heart failure                                                                                                                                                                         |

All subjects presented chronic cough as the sole or predominant symptom.

**Table S2** Spectrum and characteristic of chronic cough in different causes

| Variables                    | Common causes, n=1,055 | UC, n=173                   | OCC, n=330                       | Rare causes, n=235     | P value |
|------------------------------|------------------------|-----------------------------|----------------------------------|------------------------|---------|
| Female                       | 51.7                   | 48.0                        | 47.9                             | 54.9                   | 0.317   |
| Age (years)                  | 42.1±13.8*             | 41.1±12.8*                  | 45.1±14.4 <sup>#</sup>           | 48.2±15.1 <sup>#</sup> | <0.001  |
| Duration (months)            | 24 (8 to 84)*          | 36 (12 to 96) <sup>*#</sup> | 36 (12 to 120) <sup>#&amp;</sup> | 24 (10 to 72)*         | 0.001   |
| Non-productive cough         | 55.1*                  | 72.8 <sup>#</sup>           | 46.8*                            | 50.0*                  | <0.001  |
| Timing of cough              |                        |                             |                                  |                        |         |
| Daily cough                  | 85.0*                  | 91.7*                       | 89.2*                            | 89.3*                  | 0.031   |
| Nocturnal cough              | 43.5*                  | 35.9*                       | 39.4*                            | 37.9*                  | 0.138   |
| Morning cough                | 40.3*                  | 46.5 <sup>#</sup>           | 45.5 <sup>#</sup>                | 52.7 <sup>#</sup>      | 0.007   |
| Cough before sleep           | 54.8*                  | 56.0 <sup>#</sup>           | 58.2 <sup>#</sup>                | 66.2 <sup>#</sup>      | 0.028   |
| Concomitant symptoms         |                        |                             |                                  |                        |         |
| Laryngeal paresthesia        | 28.1*                  | 41.1 <sup>#</sup>           | 32.8 <sup>#</sup>                | 41.5 <sup>#</sup>      | <0.001  |
| Sneezes                      | 40.2*                  | 27.1 <sup>#</sup>           | 31.1 <sup>#</sup>                | 34.6 <sup>#</sup>      | 0.001   |
| Nasal congestion             | 35.7*                  | 37.6*                       | 31.0*                            | 36.5*                  | 0.356   |
| Postnasal dripping           | 26.4*                  | 18.8*                       | 21.9*                            | 29.3*                  | 0.044   |
| Runny nose                   | 30.7*                  | 18.9 <sup>#</sup>           | 27.1 <sup>#</sup>                | 27.9 <sup>#</sup>      | 0.017   |
| Throat clearing              | 35.5*                  | 31.8*                       | 30.7*                            | 34.8*                  | 0.405   |
| Chest tightness              | 25.9 <sup>#</sup>      | 25.3 <sup>#</sup>           | 21.5 <sup>#</sup>                | 34.1*                  | 0.015   |
| Shortness of breath          | 26.5*                  | 17.2*                       | 24.3*                            | 28.5*                  | 0.047   |
| Previous diagnosis           |                        |                             |                                  |                        |         |
| Pharyngitis                  | 44.5*                  | 45.5*                       | 41.6*                            | 39.0*                  | 0.503   |
| Rhinitis                     | 27.6*                  | 18.5*                       | 22.1*                            | 18.8*                  | 0.016   |
| Acute bronchitis             | 26*                    | 23.7*                       | 25.7*                            | 20.3*                  | 0.453   |
| Chronic bronchitis           | 32*                    | 32.6*                       | 31.4*                            | 33.5*                  | 0.973   |
| Pneumonia                    | 8.5*                   | 6.1*                        | 10.8*                            | 13.1*                  | 0.129   |
| Previous treatment           |                        |                             |                                  |                        |         |
| Antibiotic                   | 78.1                   | 78.4                        | 84.8                             | 80.3                   | 0.104   |
| Oral corticosteroids         | 18.4                   | 26.7                        | 17.0                             | 20.0                   | 0.108   |
| Inhaled corticosteroid       | 29.2                   | 39.4                        | 29.7                             | 34.8                   | 0.703   |
| Antitussive                  | 73                     | 78.8                        | 74.5                             | 74.6                   | 0.561   |
| Traditional Chinese medicine | 67.1*                  | 69.9 <sup>#</sup>           | 66.7 <sup>#</sup>                | 56.8 <sup>#</sup>      | 0.037   |
| Anti-allergic agents         | 47.4*                  | 52.6*                       | 37.5 <sup>#</sup>                | 39.7 <sup>#</sup>      | 0.040   |

Data were presented as percentage, mean ± SD, or median (IQR). \*, a subset of different causes of chronic cough categories whose column data do not differ significantly from each other at the 0.05 level.; #, a subset of different causes of chronic cough categories whose column data do not differ significantly from each other at the 0.05 level; &, a subset of different causes of chronic cough categories whose column data do not differ significantly from each other at the 0.05 level. P values for post-hoc test was adjusted with Bonferroni method. OCC, other common causes; UC, unexplained cough.
